# Supplementary material for: Heart regeneration in the salamander relies on macrophage-mediated control of fibroblast activation and the extracellular landscape
Source: PubMed Central journal article supplement (PMC5677961; doi:10.1038/s41536-017-0027-y), 2017-07-27
Supplement: 41536_2017_27_MOESM1_ESM.pdf [file 41536_2017_27_MOESM1_ESM.pdf]

**Supplementary Table 1. Primer Sequences used for qPCR**

| <b>Primer</b>             | <b>Forward</b>          | <b>Reverse</b>        |
|---------------------------|-------------------------|-----------------------|
| RBL27                     | CATCAGATCAAGCAAGCAGTA   | CCAATGCAGCAGTTTAGATG  |
| $\beta$ -actin            | TCCATGAAGGCTGCCCAACT    | TGGCGCCACATCTGATTGAT  |
| GAPDH                     | GACAAGGCATCTGCTCACCT    | ATGTTCTGGTTGGCACCTCT  |
| CSF1R                     | CTCCAGGATGGGACTGTCAT    | CCGCTTGGAGGTAGAGTCTG  |
| MPO                       | TCAACAGCTGGAGAATCGTG    | ATGTTGATGGCGGCTAAATC  |
| Collagen I-A2<br>(Col1a2) | ACCTGGTGGAAAGGGAGACT    | GAAGATCCAGGTTCCCCATT  |
| TGF- $\beta$ 1            | CAAGCGTGCTCTGGATGT      | GCAGTTCTTCTCCTGTGA    |
| DDR2                      | ACTTTGGGATGAGTCGGAAC    | ACTTGCCCAATAGGATGCTC  |
| Vimentin                  | AACCTTGCAGAGACCGAAGA    | GTAGTCGTTGGCGTCCTGTT  |
| DPP4                      | TTACATGTGCCTTCCCCTG     | TTTGAAATTCGGTGCTCTTG  |
| ICAM1                     | AGCATAACGGCAAGATGGTC    | GGATTTTCCCTCAATCAGCA  |
| LOX                       | AAGACACGTCGTGCGATTAC    | CACGTCCGTGATGTCTATCC  |
| LOXL1                     | CTACATCCTGAAGGTGGTGGT   | GCAGTTAGTGGTGGAGACGA  |
| LOXL4                     | GTGCCGGTGTAATACGATG     | CCAGGTCTGATCTGTAGGCA  |
| LOX5a                     | CACTGCTCACACTCAGGGTT    | ACTTGGAAGGTTGGGTTTAC  |
| MMP2                      | GGCGATGGTCAAGTTGTAAA    | GTTGTGGAGCACCAGAGAAA  |
| MMP3                      | CCATACAGGGCTTGAATGCCATT | TTGGGTCAGCATTGGTG     |
| MMP9                      | GCATCGTAGGATTCTCCATCA   | ACCAGTGAAGGCCGTTCCGAT |
| MMP13                     | AAGCCCTCATGTATCCCATC    | GGATTCCTCGAGCCATAGAG  |
| MMP14                     | TGGATAACTGAATGTGCGGA    | GACGCTGACACTCAACCTCA  |
| MMP19                     | AGAGGACCAAGAAGCTACGC    | TGGAAAGATCTCAGGGCTTC  |
| Tgm2                      | ATGGCTCCGTCAAGAAGACT    | TTTCTTCATCCGATCCTTCC  |
| Adh1a3                    | CAAAAGAACCTTCCCGACAA    | GAGGCATCCATTCTTCTCCA  |
