# Supplementary material for: Heart regeneration in the salamander relies on macrophage-mediated control of fibroblast activation and the extracellular landscape
Source: PubMed Central journal article supplement (PMC5677961; doi:10.1038/s41536-017-0027-y), 2017-07-27
Supplement: 41536_2017_27_MOESM3_ESM.pdf [file 41536_2017_27_MOESM3_ESM.pdf]

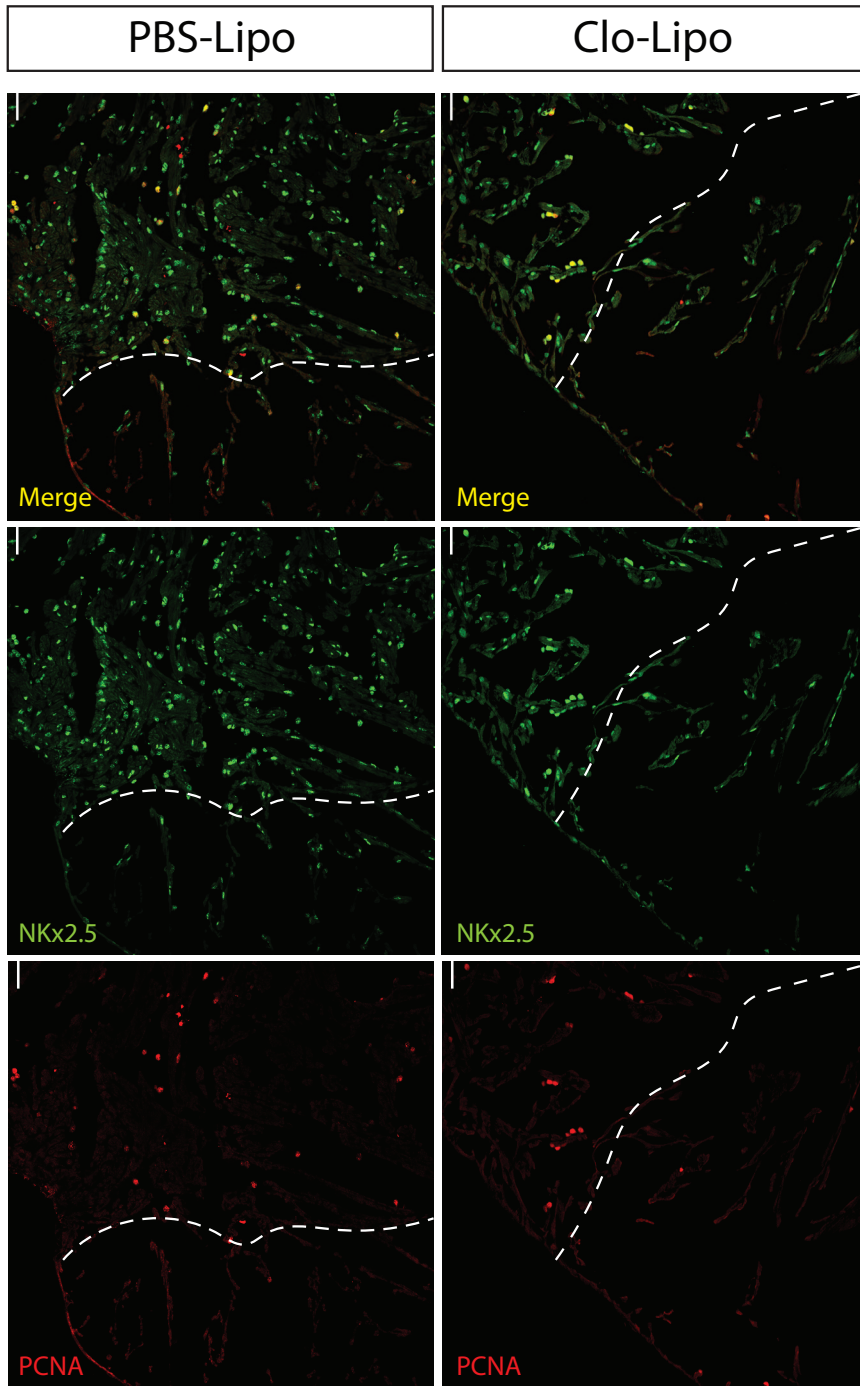

**Supplementary figure 2. Staining strategy for counting CM proliferation in cryo injured hearts.**

CMs were identified as PCNA+ (Red) Nkx2.5+ (Green) dual positive cells.
